# Supplementary material
Source: Springer Nature journal article supplement (https://www.springermedizin.de/resource/supplementary/12960_2013_392_MOESM1_ESM.pdf/9570096)
Supplement: MOESM1 [file 9570096]

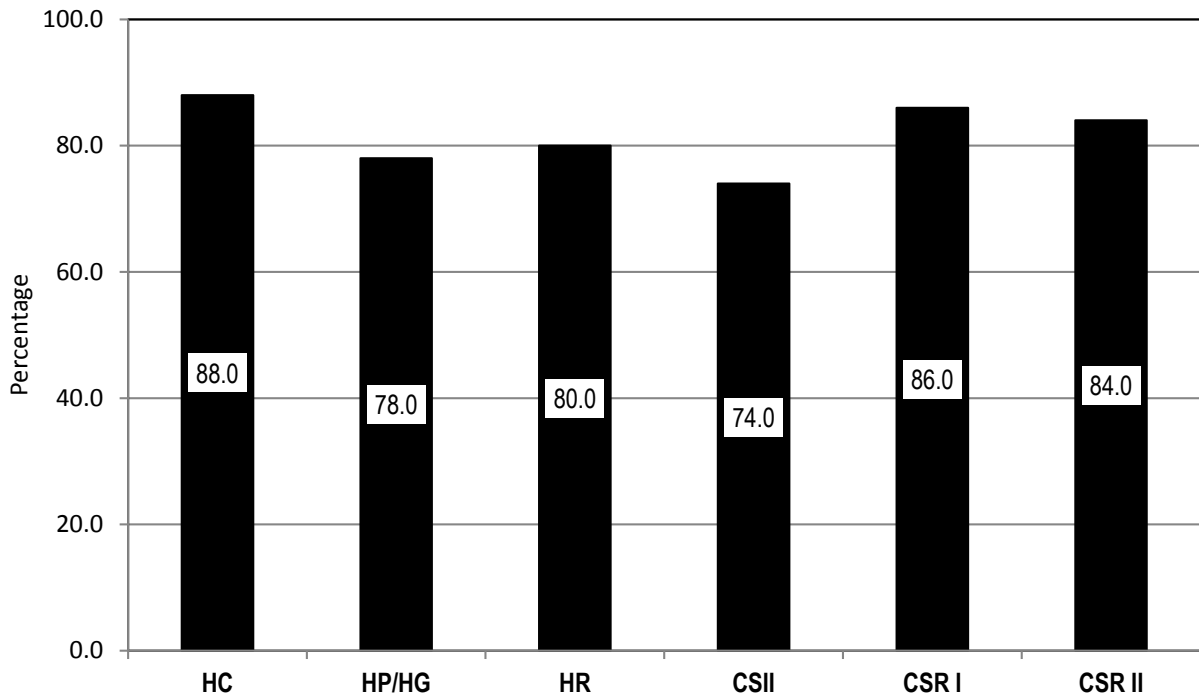

Legend: HC = Central Hospital ; HP/HG = Provincial/General Hospital ; HR = Rural Hospital ; CSU = Urban Health Center ; CSR I = Rural Health Center, Type 1; CSR II = Rural Health Center, Type 2.
